# Supplementary material
Source: PubMed Central journal article supplement (PMC1987385)
Supplement: NIHMS29177-supplement-01.pdf [file NIHMS29177-supplement-01.pdf]

| Codon                 | Frequency in <i>Mtb</i> | Occurrence in <i>flp</i> gene | Codon                 | Frequency in <i>Mtb</i> | Occurrence in <i>flp</i> gene | Codon                 | Frequency in <i>Mtb</i> | Occurrence in <i>flp</i> gene | Codon                 | Frequency in <i>Mtb</i> | Occurrence in <i>flp</i> gene |
|-----------------------|-------------------------|-------------------------------|-----------------------|-------------------------|-------------------------------|-----------------------|-------------------------|-------------------------------|-----------------------|-------------------------|-------------------------------|
| GCA Ala (0.10)        | 11                      |                               | <b>CAG Gln (0.74)</b> | <b>9</b>                |                               | UUG Leu (0.18)        | 7                       |                               | UAA . (0.16)          | 1                       |                               |
| <b>GCC Ala (0.45)</b> | <b>4</b>                |                               | (Q) _____             | 17                      |                               | (L) _____             | 38                      |                               | UAG . (0.30)          | 0                       |                               |
| <b>GCG Ala (0.37)</b> | <b>1</b>                |                               | GAA Glu (0.35)        | 16                      |                               | AAA Lys (0.26)        | 20                      |                               | <b>UGA . (0.55)</b>   | <b>0</b>                |                               |
| GCU Ala (0.08)        | 8                       |                               | <b>GAG Glu (0.65)</b> | <b>10</b>               |                               | <b>AAG Lys (0.74)</b> | <b>16</b>               |                               | (.) _____             | 1                       |                               |
| (A) _____             | 24                      |                               | (E) _____             | 26                      |                               | (K) _____             | 36                      |                               | ACA Thr (0.08)        | 12                      |                               |
| AGA* Arg (0.02)       | 7                       |                               | GGA Gly (0.10)        | 8                       |                               | <b>AUG Met (1.0)</b>  | <b>7</b>                |                               | <b>ACC Thr (0.60)</b> | <b>4</b>                |                               |
| AGG* Arg (0.04)       | 7                       |                               | <b>GGC Gly (0.51)</b> | <b>3</b>                |                               | (M) _____             | 7                       |                               | <b>ACG Thr (0.26)</b> | <b>3</b>                |                               |
| CGA Arg (0.10)        | 2                       |                               | GGG Gly (0.20)        | 2                       |                               | <b>UUC Phe (0.79)</b> | <b>9</b>                |                               | ACU Thr (0.06)        | 9                       |                               |
| <b>CGC Arg (0.39)</b> | <b>1</b>                |                               | GGU Gly (0.19)        | 3                       |                               | UUU Phe (0.21)        | 12                      |                               | (T) _____             | 28                      |                               |
| <b>CGG Arg (0.34)</b> | <b>1</b>                |                               | (G) _____             | 16                      |                               | (F) _____             | 21                      |                               | <b>UGG Trp (1.0)</b>  | <b>6</b>                |                               |
| CGU Arg (0.12)        | 2                       |                               | <b>CAC His (0.71)</b> | <b>4</b>                |                               | CCA Pro (0.11)        | 8                       |                               | (W) _____             | 6                       |                               |
| (R) _____             | 20                      |                               | CAU His (0.29)        | 5                       |                               | CCC Pro (0.29)        | 1                       |                               | <b>UAC Tyr (0.71)</b> | <b>11</b>               |                               |
| <b>AAC Asn (0.79)</b> | <b>6</b>                |                               | (H) _____             | 9                       |                               | <b>CCG Pro (0.54)</b> | <b>1</b>                |                               | UAU Tyr (0.29)        | 9                       |                               |
| AAU Asn (0.21)        | 17                      |                               | AUA* Ile (0.05)       | 17                      |                               | CCU Pro (0.06)        | 6                       |                               | (Y) _____             | 20                      |                               |
| (N) _____             | 23                      |                               | <b>AUC Ile (0.80)</b> | <b>9</b>                |                               | (P) _____             | 16                      |                               | GUA Val (0.06)        | 5                       |                               |
| <b>GAC Asp (0.73)</b> | <b>1</b>                |                               | AUU Ile (0.15)        | 10                      |                               | AGC Ser (0.26)        | 10                      |                               | GUC Val (0.38)        | 5                       |                               |
| GAU Asp (0.27)        | 14                      |                               | (I) _____             | 36                      |                               | AGU Ser (0.06)        | 7                       |                               | <b>GUG Val (0.47)</b> | <b>4</b>                |                               |
| (D) _____             | 15                      |                               | CUA* Leu (0.05)       | 9                       |                               | UCA Ser (0.07)        | 12                      |                               | GUU Val (0.09)        | 5                       |                               |
| <b>UGC Cys (0.75)</b> | <b>0</b>                |                               | <b>CUC Leu (0.18)</b> | <b>2</b>                |                               | UCC Ser (0.21)        | 1                       |                               | (V) _____             | 19                      |                               |
| UGU Cys (0.25)        | 5                       |                               | <b>CUG Leu (0.52)</b> | <b>5</b>                |                               | <b>UCG Ser (0.35)</b> | <b>5</b>                |                               |                       |                         |                               |
| (C) _____             | 5                       |                               | CUU Leu (0.06)        | 4                       |                               | UCU* Ser (0.04)       | 6                       |                               |                       |                         |                               |
| CAA Gln (0.26)        | 8                       |                               | UUA* Leu (0.02)       | 11                      |                               | (S) _____             | 41                      |                               | Total _____           | 424                     |                               |

Table S1. Song et al.

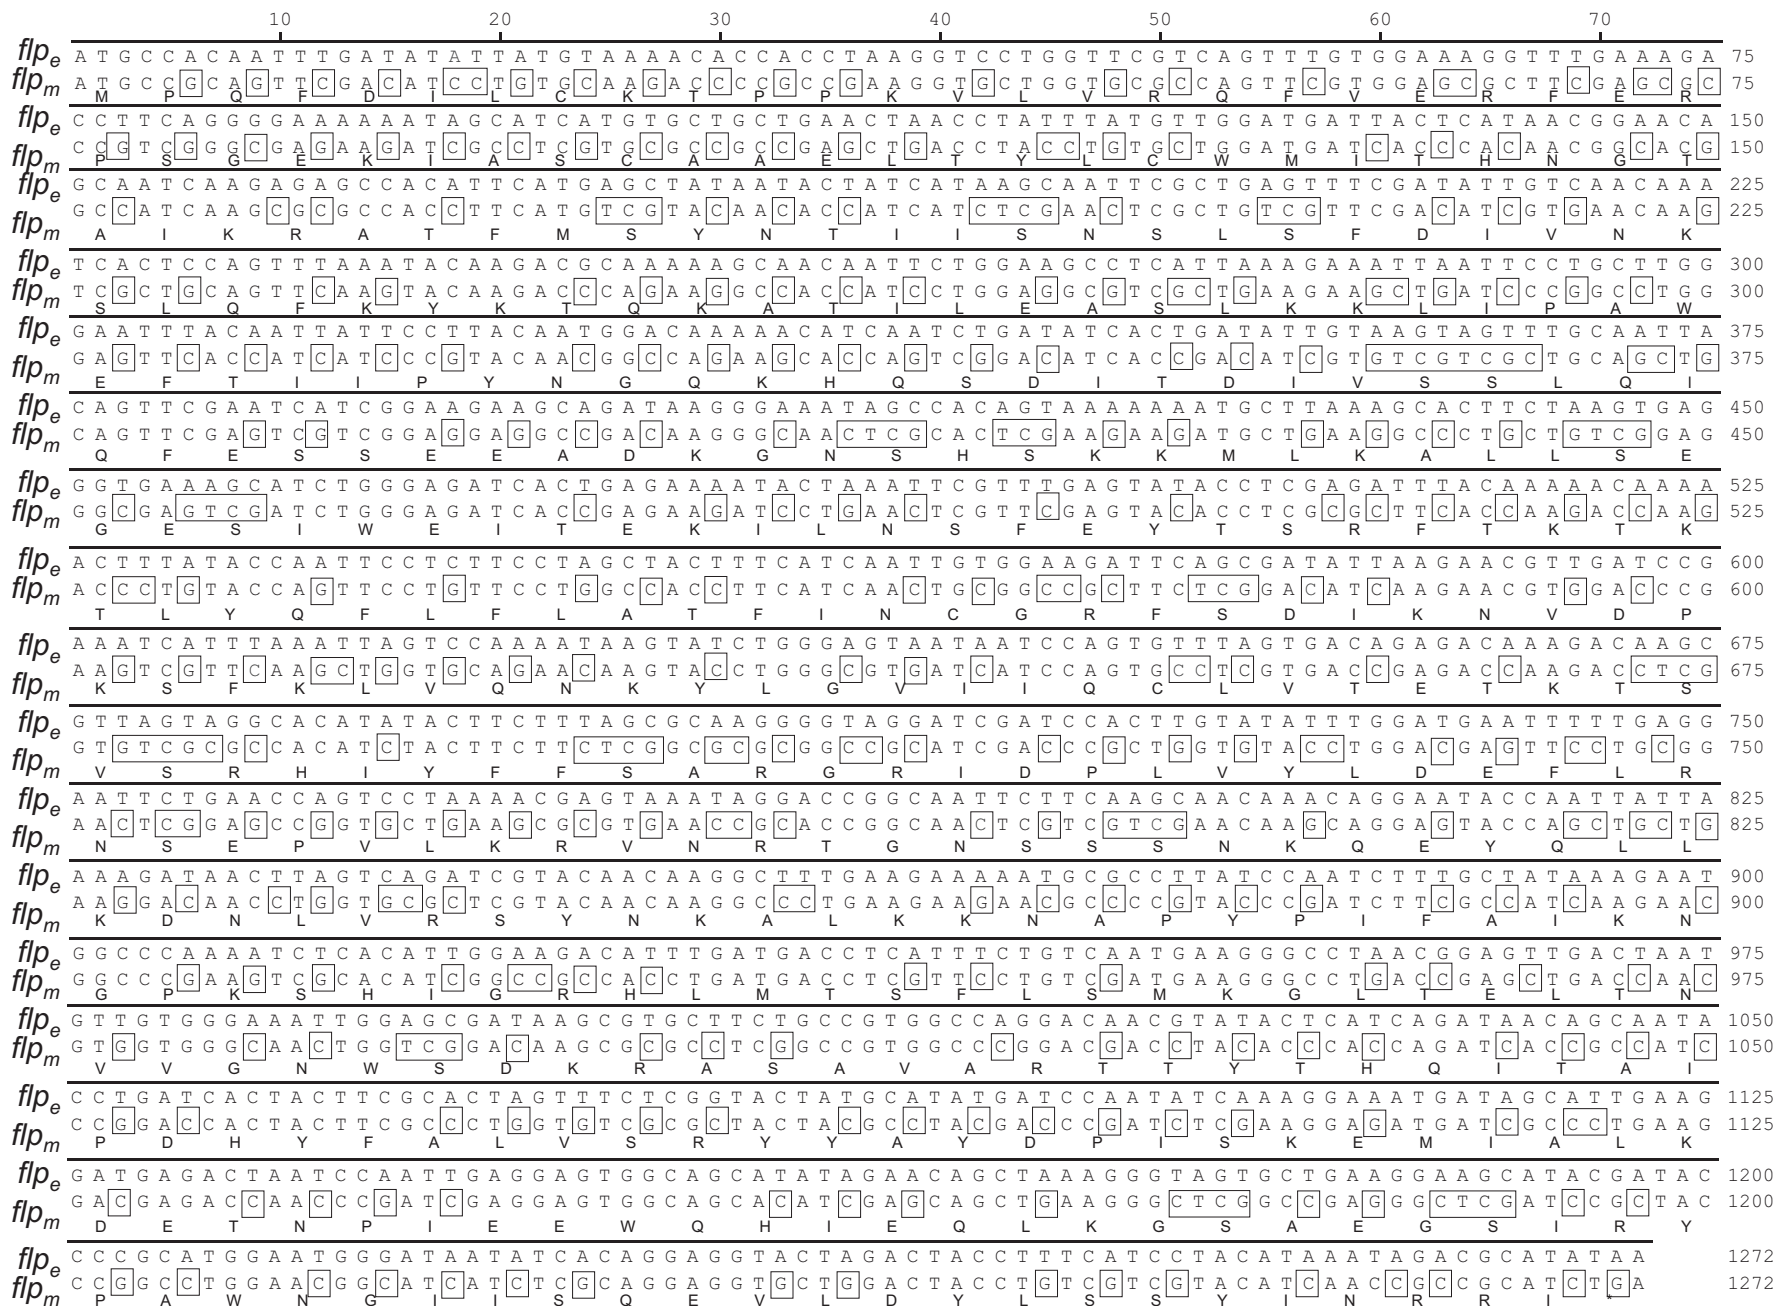

Fig. S1. Song et al.
